# Supplementary material for: Leaf wax n -alkane distributions record ecological changes during theYounger Dryas at Trzechowskie paleolake (Northern Poland)without temporal delay
Source: Copernicus journal article supplement (doi:10.5194/cp-2018-6), 2018-03-19
Supplement: Supplementary file 1 [file cp-2018-6-supplement.zip]

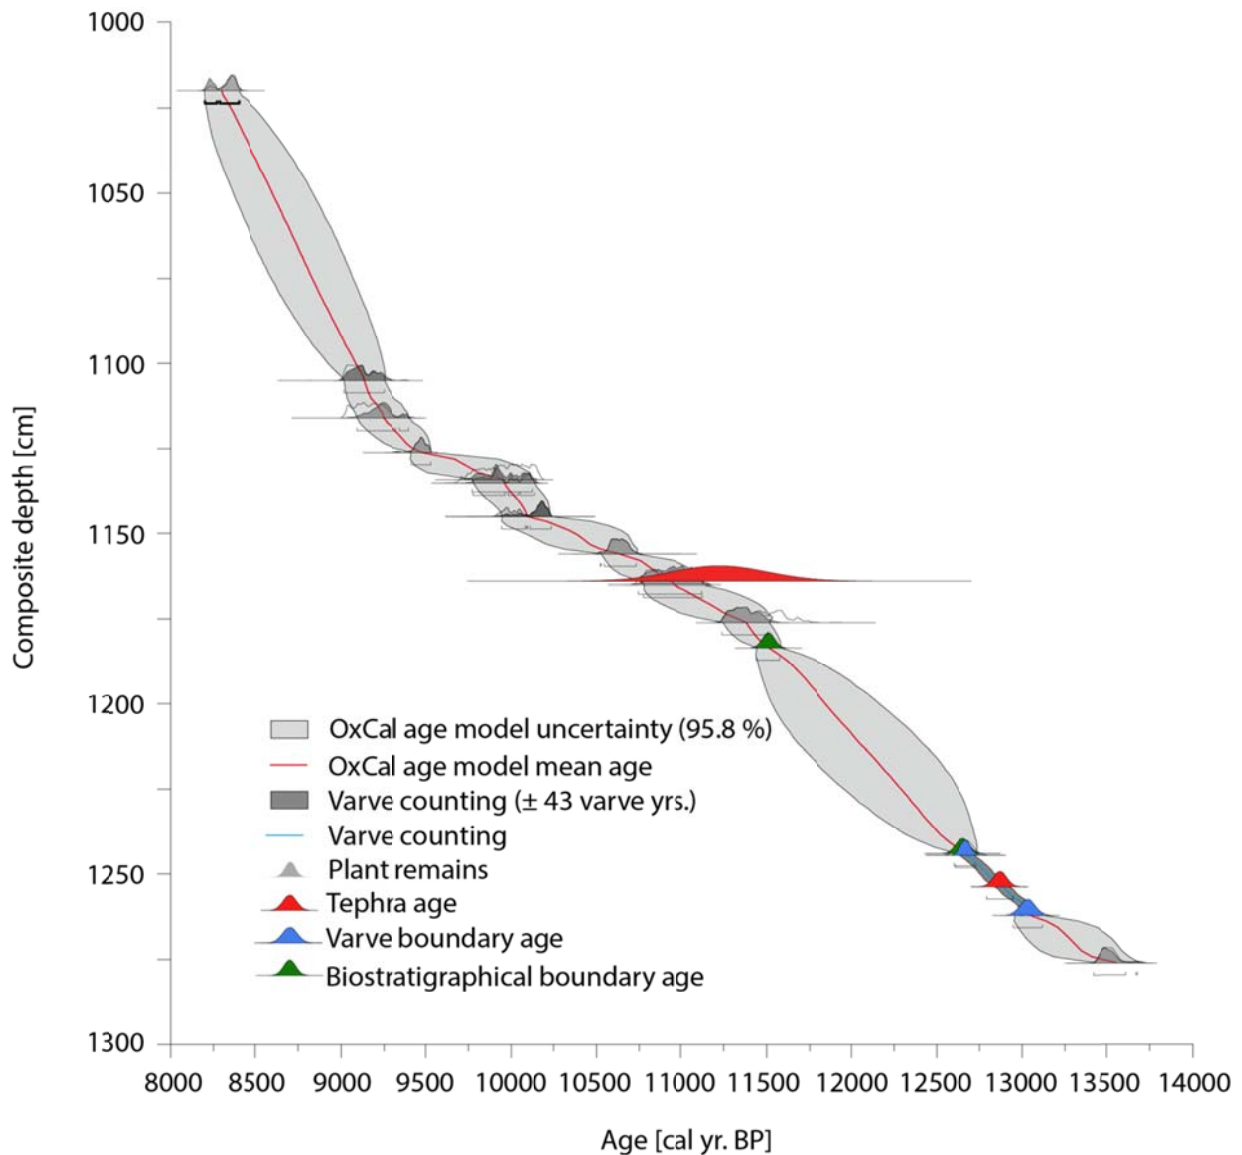

TRZ age model using the P\_Sequence model (2,0.5,U(-2,2)) in OxCal v.4.2 (Bronk Ramsey, 2008; Bronk Ramsey and Lee, 2013) with the IntCal13 radiocarbon calibration dataset (Reimer et al., 2013). The information of 11 AMS  $^{14}\text{C}$  dates, two varve ages, two tephra ages and a biostratigraphy age (Table 1) have been implemented in the P\_Sequence age model. The floating varve chronology has been anchored by means of the Laacher See Tephra age at  $12,880 \pm 40$  varve yrs. BP (Brauer et al. 1999) previously identified in the TRZ record (Wulf et al. 2013). The identification of the Askja-S cryptotephra allowed to transfer the age of  $11228 \pm$  cal yrs BP as reported from the neighbouring Lake Czechowskie sediment record (Ott et al. 2016).
